# Supplementary material for: Discovery of novel elongator protein 2 inhibitors by compound library screening using surface plasmon resonance
Source: PubMed Central journal article supplement — RSC Adv. 2019 Jan 14;9(3):1696–704. doi: 10.1039/c8ra09640f (PMC9059734; doi:10.1039/c8ra09640f), 2019-01-14
Supplement: RA-009-C8RA09640F-s001.pdf [file RA-009-C8RA09640F-s001.pdf]

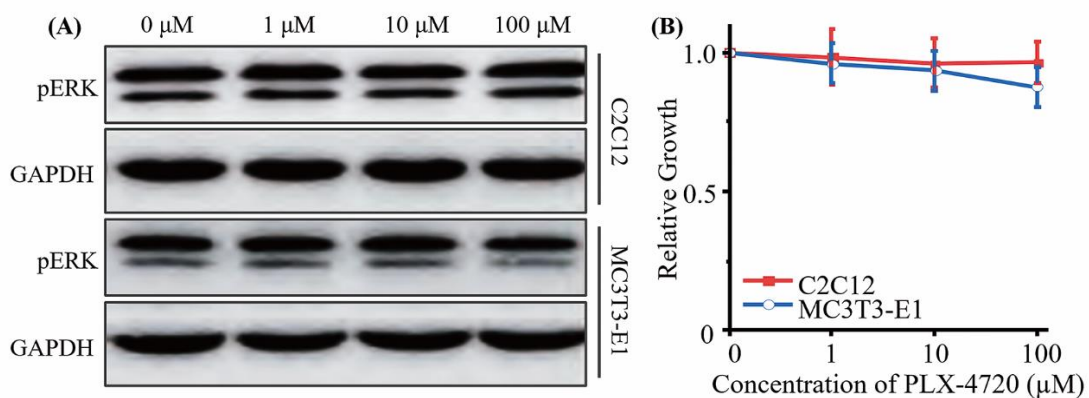

Supplementary Figure 1. The influence of ERK phosphorylation and cell proliferation in C2C12 cell and MC3T3-E1 cell. To further investigate the influence of PLX-4720 on ERK phosphorylation and cell proliferation of normal body cells, 4 groups of C2C12 cell and MC3T3-E1 cell were administered with 0 μM, 1 μM, 10 μM and 100 μM PLX4720, individually. (A) The cell lysates were subject to western blot analysis. According to the result of grayscale analysis, the content of phosphorylated ERK (p-ERK) in C2C12 and MC3T3-E1 cells remained unaffected when given 1 μM, 10 μM and 100 μM of PLX4720, compared to 0 μM group ( $p < 0.05$ ). (B) Cellular proliferation was determined with Cell Proliferation Kit I (Sigma-Aldrich, Germany) according to the official protocol. The growth of the C2C12 cell line was not inhibited even at a high dose of 100 μM, while the growth of MC3T3-E1 cells decreased (to 83.15%) when the dose reached 100 μM, which is presumed to be related to the pluripotent stem cell properties of the cell line.
