# Supplementary material for: Discovery of novel elongator protein 2 inhibitors by compound library screening using surface plasmon resonance
Source: PubMed Central journal article supplement — RSC Adv. 2019 Jan 14;9(3):1696–704. doi: 10.1039/c8ra09640f (PMC9059734; doi:10.1039/c8ra09640f), 2019-01-14
Supplement: RA-009-C8RA09640F-s002.pdf [file RA-009-C8RA09640F-s002.pdf]

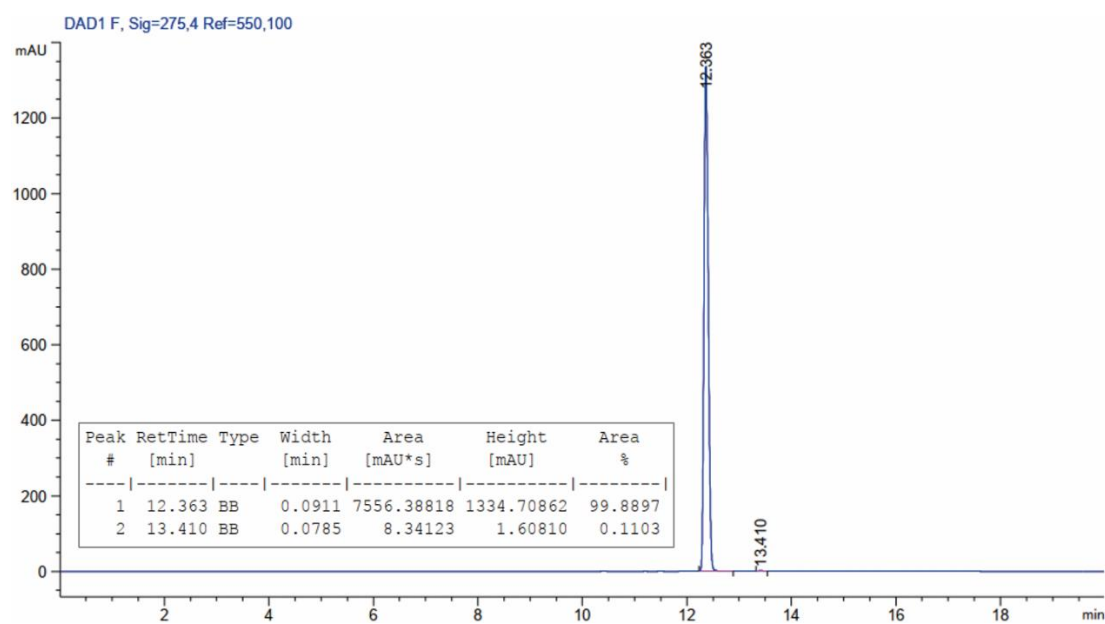

Supplementary Figure 2. The chromatograms of HPLC to identify the purity of PLX4720 compound sample used in this study.
